# Supplementary material for: Comparison of a time-varying covariate model and a joint model of time-to-event outcomes in the presence of measurement error and interval censoring: application to kidney transplantation
Source: PubMed Central journal article supplement (PMC6595621; doi:10.1186/s12874-019-0773-1), 2019-06-26
Supplement: 12874_2019_773_MOESM1_ESM.pdf [file 12874_2019_773_MOESM1_ESM.pdf]

Joint Modeling of Longitudinal and Interval Censored  
Time-to-Event Outcomes: Application to Tacrolimus and Antibody  
Formation in Kidney Transplant Patients  
Additional File 1

K. Campbell, E. Juarez-Colunga, GK. Grunwald, J. Cooper, S. Davis, and J. Gralla

June 17, 2019

**Weibull hazard function:**

$$h_{it} = \alpha \exp(\beta_0 + \beta_2'x_{2i} + \lambda_0 a_{0i} + \lambda_1 a_{1i})t^{\alpha-1} \quad (1)$$

**Likelihood Construction:**

The log likelihood for the  $i$ th subject is written as:

$$LL_i = \sum_{j=1}^{n_i} \left\{ -\frac{1}{2} \ln(2\pi\sigma_e^2) - \frac{1}{2\sigma_e^2} (y_{ij} - b_0 - b_1 t_{ij} - \beta_1' x_{1i} - a_{0i} - a_{1i} t_{ij})^2 \right\} \\ - I_{Ri} \ln\{1 - F_i(t_{Ri})\} + (1 - I_{Ri}) \ln\{F_i(t_{Ri}) - F_i(t_{Li})\}$$

Note that  $H(t) = -\ln[1 - F(t)]$ , so the contribution for right censored patients is:

$$I_{Ri} \ln\{1 - F_i(t_{Ri})\} = -I_{Ri} [\exp\{\beta_0 + \beta_2'x_{2i} + \lambda_0 a_{0i} + \lambda_1 a_{1i}\} t_{Ri}^\alpha]$$

Also, note that  $F(t) = 1 - \exp\{-H(t)\}$ , so the contribution for interval censored patients is:

$$I_i \ln\{F_i(t_{Ri}) - F_i(t_{Li})\} = \delta_{I_i} \ln\{e^{-H(t_{Li})} - e^{-H(t_{Ri})}\} \\ = I_i \ln[\exp\{\exp\{\beta_0 + \beta_2'x_{2i} + \lambda_0 a_{0i} + \lambda_1 a_{1i}\} t_{Li}^\alpha\} - \exp\{-\exp\{\beta_0 + \beta_2'x_{2i} + \lambda_0 a_{0i} + \lambda_1 a_{1i}\} t_{Ri}^\alpha\}]$$

So, all together:

$$LL_i = \sum_{j=1}^{n_i} \left\{ -\frac{1}{2} \ln(2\pi\sigma_e^2) - \frac{1}{2\sigma_e^2} (y_{ij} - b_0 - b_1 t_{ij} - \beta_1' x_{1i} - a_{0i} - a_{1i} t_{ij})^2 \right\} \\ - I_{Ri} [\exp\{\beta_0 + \beta_2'x_{2i} + \lambda_0 a_{0i} + \lambda_1 a_{1i}\} t_{Ri}^\alpha] \\ = I_i \ln[\exp\{-\exp\{\beta_0 + \beta_2'x_{2i} + \lambda_0 a_{0i} + \lambda_1 a_{1i}\} t_{Li}^\alpha\} - \exp\{-\exp\{\beta_0 + \beta_2'x_{2i} + \lambda_0 a_{0i} + \lambda_1 a_{1i}\} t_{Ri}^\alpha\}]$$

**Histogram of TAC**

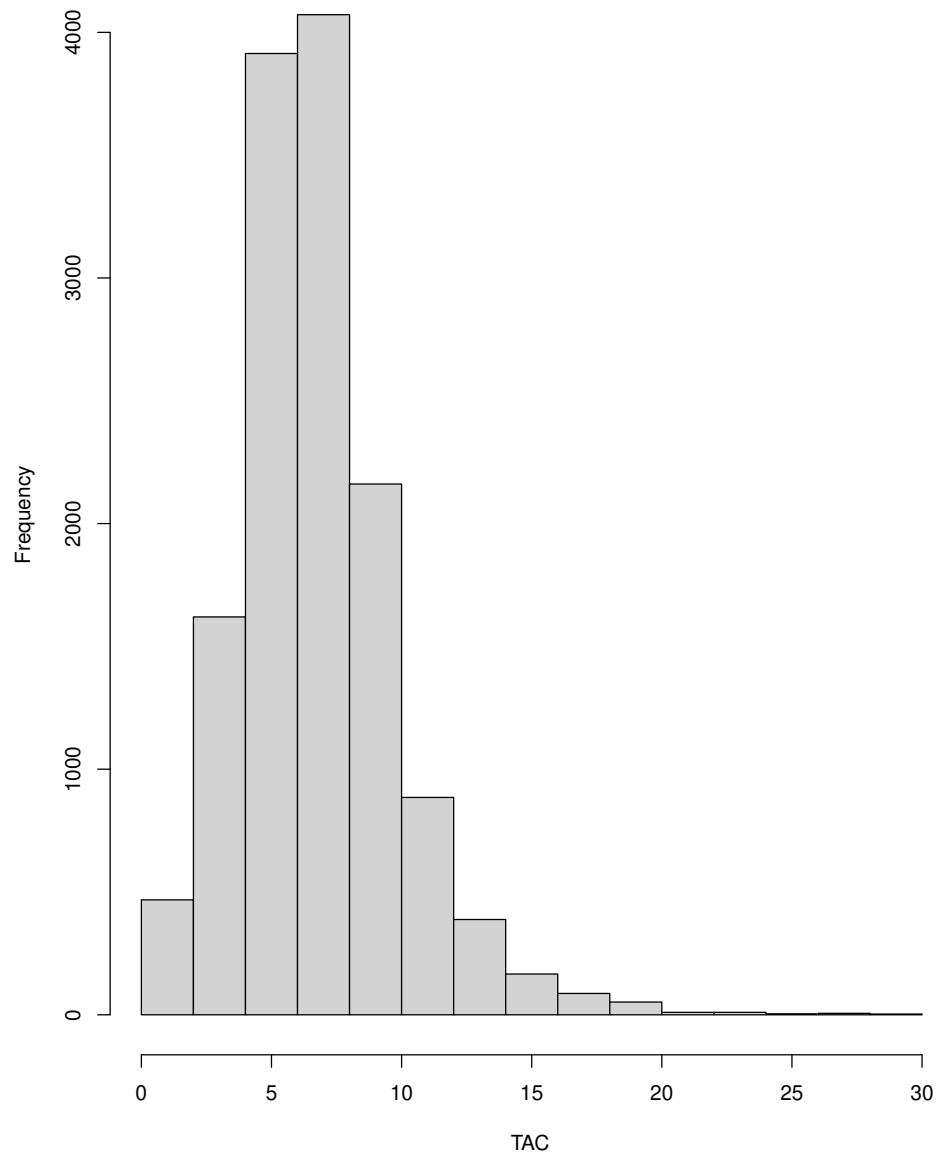

Figure S1: Distribution of TAC

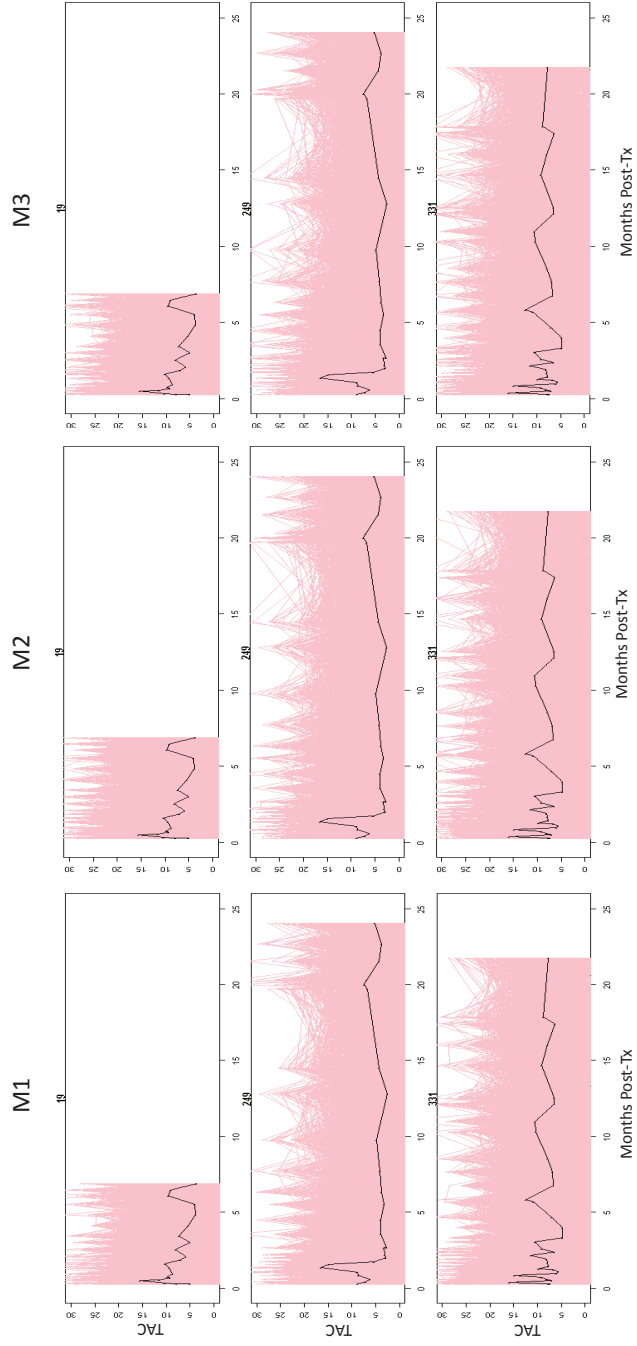

Figure S2: Posterior Predictive Trajectories and the observed trajectory for 3 individuals for the three joint models, M1-M3

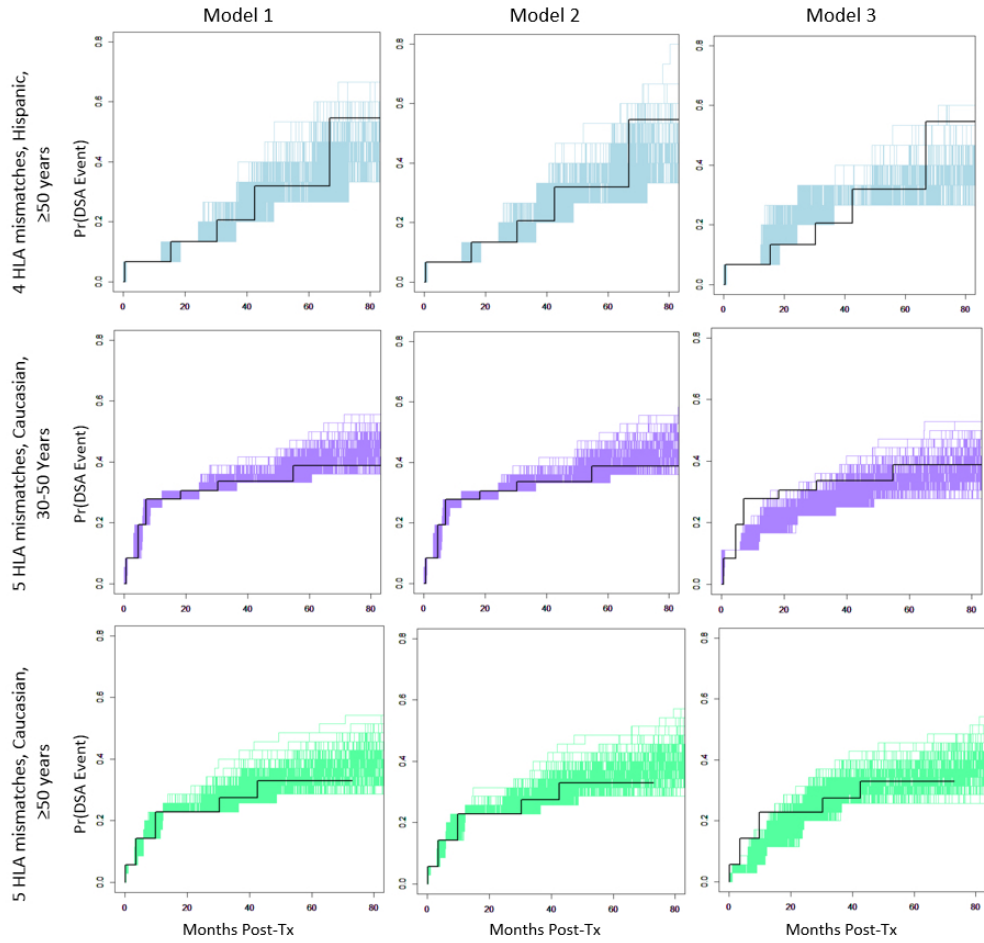

Figure S3: Posterior predictive interval censored cumulative density curve and the observed interval censored cumulative density curve for 3 types of subjects for the 3 joint models M1, M2, and M3.

Table S1: Results from sensitivity analysis. First column is the results from the actual model that was fit in the Results section of the paper. This has normal priors for regression and association parameters and a uniform distribution for the standard deviation of the random error term.

|                                 | Model 1<br><i>Mean (95% CrI)</i>         | Regression/Loading Params<br>Uniform Prior<br><i>Mean (95% CrI)</i> | Half-Cauchy Prior<br>for $\sigma_\epsilon^2$<br><i>Mean (95% CrI)</i> |
|---------------------------------|------------------------------------------|---------------------------------------------------------------------|-----------------------------------------------------------------------|
| Linear                          |                                          |                                                                     |                                                                       |
| $b_0$                           | 7.24 (7.12, 7.37)                        | 7.24 (7.11, 7.36)                                                   | 7.24 (7.12, 7.37)                                                     |
| $b_1$                           | -0.05 (-0.06, -0.04)                     | -0.05 (-0.06, -0.04)                                                | -0.05 (-0.06, -0.04)                                                  |
| $\sigma_\epsilon^2$             | 7.44 (7.26, 7.63)                        | 7.37 (7.19, 7.56)                                                   | 7.37 (7.19, 7.55)                                                     |
| $\rho$                          | -0.38 (-0.52, -0.24)                     | -0.40 (-0.52, -0.26)                                                | -0.40 (-0.52, -0.26)                                                  |
| $\sigma_0^2$                    | 1.66 (1.40, 1.94)                        | 1.73 (1.47, 2.01)                                                   | 1.73 (1.47, 2.04)                                                     |
| $\sigma_1^2$                    | 0.004 (0.003, 0.005)                     | 0.004 (0.003, 0.005)                                                | 0.004 (0.003, 0.005)                                                  |
| Survival                        |                                          |                                                                     |                                                                       |
| $\alpha$                        | 0.57 (0.47, 0.69)<br><i>HR (95% CrI)</i> | 0.55 (0.46, 0.67)<br><i>HR (95% CrI)</i>                            | 0.55 (0.46, 0.65)<br><i>HR (95% CrI)</i>                              |
| $\beta_0$                       | 0.03 (0.01, 0.06)                        | 0.03 (0.02, 0.06)                                                   | 0.03 (0.02, 0.06)                                                     |
| $\beta_1$ (HLA Mismatch Number) | 1.26 (1.13, 1.40)                        | 1.28 (1.15, 1.42)                                                   | 1.28 (1.15, 1.42)                                                     |
| $\beta_2$ (African American)    | 2.09 (1.23, 3.39)                        | 2.02 (1.17, 3.25)                                                   | 2.00 (1.16, 3.13)                                                     |
| $\beta_3$ (Hispanic)            | 1.60 (1.05, 2.31)                        | 1.64 (1.04, 2.40)                                                   | 1.64 (1.07, 2.39)                                                     |
| $\beta_4$ (Other Race)          | 1.14 (0.34, 2.41)                        | 1.23 (0.41, 2.61)                                                   | 1.24 (0.41, 2.67)                                                     |
| $\beta_5$ (30-49 years)         | 0.57 (0.32, 0.93)                        | 0.60 (0.34, 1.00)                                                   | 0.60 (0.34, 0.99)                                                     |
| $\beta_6$ ( $\geq 50$ years)    | 0.30 (0.17, 0.49)                        | 0.32 (0.18, 0.54)                                                   | 0.32 (0.18, 0.54)                                                     |
| $\lambda_0$                     | 0.64 (0.52, 0.75)                        | 0.65 (0.53, 0.77)                                                   | 0.65 (0.54, 0.77)                                                     |
| $\lambda_1$                     | 0.43 (0.32, 0.58)                        | 0.47 (0.32, 0.63)                                                   | 0.48 (0.33, 0.63)                                                     |

Table S2: Results from the simulation study - random interval censoring. Data were simulated from the joint model with shared random intercepts, M2, and used to fit M2 and M4 by MCMC. Three simulations were performed with varying amounts of measurement error (none ( $\sigma_e^2 = 0$ ), low ( $\sigma_e^2 = 1$ ), and high ( $\sigma_e^2 = 8$ )). The follow-up visit process was set at 1 month, 6 month, 12 month, 24 months, and yearly after. Patients missed any arbitrary visit with 50% probability. Unlike in Table ??, none of these estimates are converted into hazard ratios, because the interest here is comparing the results from the simulation to the true values. The numbers presented are mean (standard deviation) of the estimates from the 200 datasets for each simulation condition.

| Variable            | No Measurement Error |               |               | Low Measurement Error |                |               | High Measurement Error |                 |               |
|---------------------|----------------------|---------------|---------------|-----------------------|----------------|---------------|------------------------|-----------------|---------------|
|                     | True Value           | M2            | M4            | True Value            | M2             | M4            | True Value             | M2              | M4            |
| $b_1$               | -0.03                | -0.02 (0.00)  |               | -0.03                 | -0.03 (0.00)   |               | -0.03                  | -0.03 (0.0001)  |               |
| $b_0$               | 7.00                 | 6.93 (0.001)  |               | 7.00                  | 6.98 (0.001)   |               | 7.00                   | 7.02 (0.001)    |               |
| $\sigma_e^2$        | 0                    | 0.00 (0.00)   |               | 1.00                  | 1.00 (0.0001)  |               | 8.00                   | 8.00 (0.002)    |               |
| $\rho$              | -0.005               | -0.01 (0.001) |               | -0.005                | -0.004 (0.001) |               | -0.005                 | -0.0004 (0.002) |               |
| $\sigma_0^2$        | 1.75                 | 1.76 (0.003)  |               | 1.75                  | 1.75 (0.003)   |               | 1.75                   | 1.75 (0.004)    |               |
| $\sigma_1^2$        | 0.004                | 0.004 (0.00)  |               | 0.004                 | 0.004 (0.000)  |               | 0.004                  | 0.004 (0.000)   |               |
| $\beta_0, \gamma_0$ | -2.00                | -2.29 (0.007) | 0.64 (0.01)   | -2.00                 | -2.30 (0.007)  | 0.45 (0.01)   | -2.00                  | -2.34 (0.007)   | -0.47 (0.008) |
| $\beta_1$ (HLA)     | 0.25                 | 0.27 (0.002)  | 0.24 (0.002)  | 0.25                  | 0.26 (0.002)   | 0.24 (0.002)  | 0.25                   | 0.27 (0.002)    | 0.23 (0.002)  |
| $\alpha$            | 0.50                 | 0.59 (0.001)  | 0.40 (0.00)   | 0.50                  | 0.58 (0.001)   | 0.41 (0.00)   | 0.50                   | 0.59 (0.001)    | 0.42 (0.00)   |
| $\lambda_0, \eta$   | -0.50                | -0.52 (0.002) | -0.33 (0.001) | -0.50                 | -0.53 (0.002)  | -0.31 (0.001) | -0.50                  | -0.54 (0.002)   | -0.19 (0.00)  |

Table S3: Additional Simulation Study Results: Credible Intervals and Coverage Probabilities. The true value of the association parameter was set to -0.50. The average credible interval (CrI) from 200 simulations is reported for each model (M2 and M4) for each simulation scenario presented in Table 4. The coverage probability was calculated as the percentage of simulations that had the true value, -0.50, within the calculated credible interval. ME: measurement error. IC: interval censoring.

| Simulation Scenario    | Model    | Average Credible Interval | Coverage Probability |
|------------------------|----------|---------------------------|----------------------|
| (1) No ME, Low IC      | JM (M2)  | (-0.659, -0.381)          | 93%                  |
|                        | TVC (M4) | (-0.432, -0.220)          | 26%                  |
| (2) Low ME, Low IC     | JM (M2)  | (-0.661, -0.382)          | 94%                  |
|                        | TVC (M4) | (-0.402, -0.199)          | 15%                  |
| (3) High ME, Low IC    | JM (M2)  | (-0.688, -0.376)          | 92%                  |
|                        | TVC (M4) | (-0.240, -0.087)          | 0%                   |
| (4) No ME, Random IC   | JM (M2)  | (-0.679, -0.376)          | 93%                  |
|                        | TVC (M4) | (-0.446, -0.217)          | 30%                  |
| (5) Low ME, Random IC  | JM (M2)  | (-0.684, -0.377)          | 95%                  |
|                        | TVC (M4) | (-0.423, -0.201)          | 24%                  |
| (6) High ME, Random IC | JM (M2)  | (-0.710, -0.372)          | 93%                  |
|                        | TVC (M4) | (-0.273, -0.103)          | 0%                   |
| (7) No ME, High IC     | JM (M2)  | (-0.745, -0.378)          | 88%                  |
|                        | TVC (M4) | (-0.379, -0.145)          | 15%                  |
| (8) Low ME, High IC    | JM (M2)  | (-0.775, -0.395)          | 86%                  |
|                        | TVC (M4) | (-0.385, -0.151)          | 20%                  |
| (9) High ME, High IC   | JM (M2)  | (-0.857, -0.408)          | 81%                  |
|                        | TVC (M4) | (-0.293, -0.100)          | 2%                   |



## Model 1 (JM) Reproducible Example:

```
## selecting only the parameters of interest to monitor (excluding likelihood)
vars<-mcmc.list(res_jm[[1]][,c(1:17)],res_jm[[2]][,c(1:17)])
summary(vars)
```

1. Empirical **mean** and standard deviation **for** each **variable**, plus standard error of the **mean**:

|               | Mean       | SD        | Naive SE  | Time-series SE |
|---------------|------------|-----------|-----------|----------------|
| b0            | 6.954070   | 7.452e-02 | 8.332e-04 | 5.949e-03      |
| b1            | -0.027505  | 4.086e-03 | 4.568e-05 | 7.215e-04      |
| sige          | 1.000249   | 5.776e-03 | 6.458e-05 | 9.269e-05      |
| precision     | 0.999602   | 1.154e-02 | 1.291e-04 | 1.851e-04      |
| prec_inv      | 1.000532   | 1.156e-02 | 1.292e-04 | 1.855e-04      |
| rho.0r        | 0.067617   | 6.175e-02 | 6.904e-04 | 1.076e-03      |
| sig.bc[1]     | 1.654051   | 1.412e-01 | 1.578e-03 | 2.346e-03      |
| sig.bc[2]     | 0.003584   | 3.314e-04 | 3.705e-06 | 7.179e-06      |
| omega.bc[1,1] | 0.614141   | 5.224e-02 | 5.841e-04 | 9.199e-04      |
| omega.bc[2,1] | -0.896581  | 8.230e-01 | 9.202e-03 | 1.456e-02      |
| omega.bc[1,2] | -0.896581  | 8.230e-01 | 9.202e-03 | 1.456e-02      |
| omega.bc[2,2] | 283.773615 | 2.606e+01 | 2.914e-01 | 6.032e-01      |
| bet0          | -2.043759  | 2.746e-01 | 3.070e-03 | 2.326e-02      |
| bet_hla       | 0.150093   | 7.159e-02 | 8.004e-04 | 5.655e-03      |
| alpha         | 0.582307   | 4.751e-02 | 5.312e-04 | 2.914e-03      |
| lam0          | -0.592618  | 7.137e-02 | 7.980e-04 | 2.312e-03      |
| lam1          | 0.428651   | 1.557e+00 | 1.741e-02 | 4.683e-02      |

2. Quantiles **for** each **variable**:

|               | 2.5%       | 25%        | 50%        | 75%        | 97.5%      |
|---------------|------------|------------|------------|------------|------------|
| b0            | 6.841771   | 6.885393   | 6.963856   | 7.022935   | 7.069696   |
| b1            | -0.035899  | -0.030211  | -0.027352  | -0.024809  | -0.019634  |
| sige          | 0.989011   | 0.996391   | 1.000232   | 1.004136   | 1.011744   |
| precision     | 0.976920   | 0.991780   | 0.999536   | 1.007256   | 1.022346   |
| prec_inv      | 0.978142   | 0.992796   | 1.000464   | 1.008289   | 1.023625   |
| rho.0r        | -0.053057  | 0.025121   | 0.067684   | 0.109759   | 0.185387   |
| sig.bc[1]     | 1.397020   | 1.557228   | 1.647406   | 1.742156   | 1.957136   |
| sig.bc[2]     | 0.002987   | 0.003351   | 0.003566   | 0.003793   | 0.004286   |
| omega.bc[1,1] | 0.515482   | 0.578846   | 0.612195   | 0.647450   | 0.721196   |
| omega.bc[2,1] | -2.496444  | -1.444929  | -0.890590  | -0.330632  | 0.695669   |
| omega.bc[1,2] | -2.496444  | -1.444929  | -0.890590  | -0.330632  | 0.695669   |
| omega.bc[2,2] | 235.077989 | 265.709530 | 282.707070 | 300.972316 | 337.013906 |
| bet0          | -2.591134  | -2.223170  | -2.044304  | -1.861695  | -1.499589  |
| bet_hla       | 0.006230   | 0.102881   | 0.150280   | 0.197456   | 0.286429   |

|       |           |           |           |           |           |
|-------|-----------|-----------|-----------|-----------|-----------|
| alpha | 0.490768  | 0.549416  | 0.581517  | 0.615312  | 0.677390  |
| lam0  | -0.738735 | -0.638706 | -0.592066 | -0.545223 | -0.456393 |
| lam1  | -2.645301 | -0.615691 | 0.404060  | 1.478742  | 3.483264  |

```
## plots
traplot(vars)
autocorr.plot(vars)
```

```
## tests of convergence
geweke.diag(vars)
```

[[1]]

Fraction in 1st **window** = 0.1  
 Fraction in 2nd **window** = 0.5

|         |          |          |           |          |
|---------|----------|----------|-----------|----------|
| b0      | b1       | sig      | precision | prec_inv |
| 2.13707 | -0.37271 | -0.91748 | 0.92775   | -0.91411 |

|               |               |               |               |
|---------------|---------------|---------------|---------------|
| omega.bc[1,1] | omega.bc[2,1] | omega.bc[1,2] | omega.bc[2,2] |
| 1.72798       | 1.36731       | 1.36731       | -0.50256      |

|          |           |           |
|----------|-----------|-----------|
| rho.0r   | sig.bc[1] | sig.bc[2] |
| -1.41746 | -1.66230  | 0.43216   |

|          |         |         |         |         |
|----------|---------|---------|---------|---------|
| bet0     | bet_hla | alpha   | lam0    | lam1    |
| -1.48643 | 1.15813 | 0.28768 | 1.01478 | 0.02158 |

[[2]]

Fraction in 1st **window** = 0.1  
 Fraction in 2nd **window** = 0.5

|          |          |         |           |          |
|----------|----------|---------|-----------|----------|
| b0       | b1       | sig     | precision | prec_inv |
| -2.11622 | -2.07081 | 1.42478 | -1.43566  | 1.42101  |

|               |               |               |               |
|---------------|---------------|---------------|---------------|
| omega.bc[1,1] | omega.bc[2,1] | omega.bc[1,2] | omega.bc[2,2] |
| -2.84444      | 2.73654       | 2.73654       | -0.83759      |

|          |           |           |
|----------|-----------|-----------|
| rho.0r   | sig.bc[1] | sig.bc[2] |
| -2.52219 | 2.79384   | 0.72391   |

|          |          |         |         |          |
|----------|----------|---------|---------|----------|
| bet0     | bet_hla  | alpha   | lam0    | lam1     |
| -0.07517 | -0.13393 | 0.79316 | 1.20012 | -1.73095 |

```
## calculate WAIC
waic.jm1.long <- waicf(res_jm,18,317)
waic.jm1.surv <- waicf(res_jm,318,617)
> print(waic.jm1.long)
$waic
[1] 44129.07

$p_waic
[1] 291.8147

$lppd
[1] -21772.72

$p_waic_1
[1] 180.8082

> print(waic.jm1.surv)
$waic
[1] 578.6873

$p_waic
[1] 6.348036

$lppd
[1] -282.9956

$p_waic_1
[1] 6.056737
```

## Model 4 (TVC) Reproducible Example:

```
## selecting only the parameters of interest to monitor (excluding likelihood)
vars<-mcmc.list(res_tvc[[1]][,c(1:4)],res_tvc[[2]][,c(1:4)])
summary(vars)
```

```
Iterations = 2001:3000
Thinning interval = 1
Number of chains = 2
Sample size per chain = 1000
```

1. Empirical **mean** and standard deviation **for each variable**, plus standard error of the **mean**:

|           | Mean    | SD      | Naive SE | Time-series SE |
|-----------|---------|---------|----------|----------------|
| gam0      | -0.8024 | 0.36720 | 0.025965 | 0.146913       |
| eta       | -0.1505 | 0.04332 | 0.003063 | 0.011836       |
| alpha_tvc | 0.2655  | 0.02333 | 0.001649 | 0.002712       |
| gam_hla   | 0.1216  | 0.05833 | 0.004124 | 0.015049       |

2. Quantiles **for each variable**:

|           | 2.5%      | 25%      | 50%     | 75%     | 97.5%    |
|-----------|-----------|----------|---------|---------|----------|
| gam0      | -1.545118 | -1.05912 | -0.7470 | -0.5376 | -0.24187 |
| eta       | -0.217281 | -0.18440 | -0.1565 | -0.1128 | -0.07603 |
| alpha_tvc | 0.218658  | 0.25255  | 0.2631  | 0.2796  | 0.31636  |
| gam_hla   | 0.008646  | 0.07885  | 0.1232  | 0.1648  | 0.21983  |

```
## plots
traplot(vars)
autocorr.plot(vars)
```

```
## tests of convergence
gelman.diag(vars)
```

Potential **scale** reduction factors:

|           | Point est. | Upper C.I. |
|-----------|------------|------------|
| gam0      | 1.45       | 2.72       |
| eta       | 1.83       | 3.62       |
| alpha_tvc | 1.01       | 1.04       |
| gam_hla   | 1.07       | 1.09       |

Multivariate psrf

1.44

```
geweke.diag(vars)
```

```
[[1]]
```

```
Fraction in 1st window = 0.1
```

```
Fraction in 2nd window = 0.5
```

```
gam0      eta      alpha_tvc  gam_hla
3.94994  -0.01095  -0.24655  -6.33207
```

```
[[2]]
```

```
Fraction in 1st window = 0.1
```

```
Fraction in 2nd window = 0.5
```

```
gam0      eta      alpha_tvc  gam_hla
-1.1836   2.6042   1.8018   -0.2949
```

```
##### calculating WAIC
```

```
waic.tvc <- waicf(res.tvc,5,304)
```

```
print(waic.tvc)
```

```
$waic
```

```
[1] 805.4979
```

```
$p_waic
```

```
[1] 3.490612
```

```
$lppd
```

```
[1] -399.2584
```

```
$p_waic_1
```

```
[1] 3.394789
```

NOTE: GCONV convergence criterion satisfied.

| Fit Statistics           |       |
|--------------------------|-------|
| -2 Log Likelihood        | 35778 |
| AIC (smaller is better)  | 35800 |
| AICC (smaller is better) | 35800 |
| BIC (smaller is better)  | 35841 |

| Parameter Estimates |          |                |     |         |         |                       |          |          |
|---------------------|----------|----------------|-----|---------|---------|-----------------------|----------|----------|
| Parameter           | Estimate | Standard Error | DF  | t Value | Pr >  t | 95% Confidence Limits |          | Gradient |
| <b>b0</b>           | 6.9690   | 0.07415        | 298 | 93.99   | <.0001  | 6.8231                | 7.1149   | 0.054314 |
| <b>b1</b>           | -0.02734 | 0.003704       | 298 | -7.38   | <.0001  | -0.03463              | -0.02006 | -1.16318 |
| <b>sig</b>          | 1.0001   | 0.005809       | 298 | 172.17  | <.0001  | 0.9887                | 1.0115   | -0.20501 |
| <b>bet0</b>         | -2.0226  | 0.2717         | 298 | -7.44   | <.0001  | -2.5573               | -1.4879  | 0.35361  |
| <b>bet_hla</b>      | 0.1468   | 0.07199        | 298 | 2.04    | 0.0423  | 0.005171              | 0.2885   | -0.26264 |
| <b>lam0</b>         | -0.5915  | 0.07033        | 298 | -8.41   | <.0001  | -0.7299               | -0.4531  | -0.71404 |
| <b>lam1</b>         | 0.4296   | 1.6082         | 298 | 0.27    | 0.7895  | -2.7351               | 3.5944   | 0.014834 |
| <b>alpha</b>        | 0.5811   | 0.04726        | 298 | 12.30   | <.0001  | 0.4881                | 0.6741   | -0.19330 |
| <b>s2a0</b>         | 1.6181   | 0.1325         | 298 | 12.21   | <.0001  | 1.3573                | 1.8790   | -1.41568 |
| <b>s2a1</b>         | 0.003561 | 0.000329       | 298 | 10.81   | <.0001  | 0.002913              | 0.004209 | 7.42673  |
| <b>cov</b>          | 0.005037 | 0.004719       | 298 | 1.07    | 0.2866  | -0.00425              | 0.01432  | -1.70062 |

Model 1 (JM) Using PROC NLMIXED
